# Supplementary material
Source: PubMed Central journal article supplement (PMC8981611)
Supplement: 13063_2022_6197_MOESM2_ESM.pdf [file 13063_2022_6197_MOESM2_ESM.pdf]

**Spatial Repellent Products for Control of Vector Borne Diseases**

**Mali**

Statistical Analysis Plan

**Version 2.5**

**Nov 11, 2021**

**Prepared by**

**Xingyuan Zhao and Fang Liu**

[fang.liu.131@nd.edu](mailto:fang.liu.131@nd.edu)

## Summary of changes in the Mali study SAP

| Version | Date          | Summary of Changes                                                                                                                                                                                                                                                                                                                   |
|---------|---------------|--------------------------------------------------------------------------------------------------------------------------------------------------------------------------------------------------------------------------------------------------------------------------------------------------------------------------------------|
| V1.0    | Sep 24, 2019  | The first draft                                                                                                                                                                                                                                                                                                                      |
| V2.0    | Feb 13, 2020  | Revised based on the feedback from VCAG                                                                                                                                                                                                                                                                                              |
| V2.1    | Jan 6, 2021   | 1) Removed pregnancy testing from the study procedure and limit the age of enrolled subjects to <10yrs, per comments from WHO ERC.<br>2) Revised sample size estimation based on the updated study population and baseline first-time infection incidence rate, which is 0.7 per-person-year down from 1 per-person-year previously. |
| V2.2    | Jan 19, 2021  | Corrected of a typo (“overall new Pf malaria infection” was misplaced under “primary endpoint” in Sec 3 and should be under “secondary endpoints” in Sec 3).                                                                                                                                                                         |
| V2.3    | March 4, 2021 | Modified the subsection (7.4) on how missing data will be handled; adjusted the definition of new infection and protection period after malaria clearance treatment in Sec 6.                                                                                                                                                        |
| V2.4    | Oct 7, 2021   | Corrected a few typos and clarified some wording based on the feedback during the review of the draft manuscript submitted to the journal of TRIALS.                                                                                                                                                                                 |
| V2.5    | Nov 2, 2021   | 1) Revised the safety analysis plan per the request of the UNITAID DSMB; 2) added the formula for calculating EIR                                                                                                                                                                                                                    |

## Table of Contents

|                                                                       |    |
|-----------------------------------------------------------------------|----|
| Summary of changes in the Mali study SAP                              | 2  |
| 1 Objectives                                                          | 4  |
| 2 Hypotheses                                                          | 4  |
| 3 Endpoints                                                           | 4  |
| 4 Study Design                                                        | 5  |
| 5 Population for analysis                                             | 5  |
| 6 Definition of new malaria infection                                 | 6  |
| 7 Statistical Methods                                                 | 7  |
| 7.1 Primary endpoint (ITT Population)                                 | 7  |
| 7.2 Secondary endpoints (ITT Population)                              | 7  |
| 7.3 Supplementary analysis                                            | 10 |
| 7.4 Handling of missing data                                          | 11 |
| 7.5 Analysis of baseline                                              | 11 |
| 7.6 Interim analysis                                                  | 11 |
| 8. Software                                                           | 11 |
| 9. Sample Size Determination                                          | 12 |
| Reference                                                             | 12 |
| Appendix                                                              | 14 |
| I. Sample size under different assumptions of baseline incidence rate | 14 |
| II. Mock Tables and Figures                                           | 15 |
| V. Some sample SAS and R procedures used in the analysis              | 19 |

## 1 Objectives

### Primary Objective

1. To evaluate the protective efficacy (PE) of spatial repellent (SR) against the first-time malaria infection in Mali.

### Secondary Objectives

1. To evaluate the PE of SR against all malaria infections (both first-time and recurrent).
2. To evaluate the PE of SR against first-time and overall malaria infections by two age subgroups (6-month to 71-month old, and 6-year to 10-year old).
3. To evaluate the effect of SR on anopheline-human contact using human biting rate (HBR) as an indicator indoors for all anopheline and by anopheline species.
4. To evaluate the effect of SR on anopheline survival and population age structure using parity rate as an indicator for all anopheline and by anopheline species.
5. To evaluate the effect of SR on anopheline infectivity using sporozoite rate as an indicator for all anopheline and by anopheline species.
6. To evaluate the effect of SR on anopheline infectivity using entomological inoculation rate (EIR = HBR × sporozoite rate) as an indicator for all anopheline and by anopheline species.
7. To evaluate the effect of SR on light trap indoor density for each anopheline species and for all anophelines.
8. To investigate the relationships between the reduction in first-time and overall malaria infection and the HLC HBR, mosquito density by light trap indoor density, the parity rate, the sporozoite rate, and the EIR for all anopheline and by anopheline species.
9. To evaluate SR insecticide resistance at baseline and each year during the intervention period and to explore its relationship with PE.
10. To assess the safety of SR.

## 2 Hypotheses

### Primary Hypothesis

$H_0$ : SR does not reduce the first-time malaria hazard rate compared to placebo in Mali.

$H_1$ : SR reduces the first-time malaria hazard rate compared to placebo (overall malaria hazard ratio between SR and placebo is  $< 1$ ; the expected hazard ratio is 70% or PE is 30%)

### Secondary Hypothesis

$H_0$ : SR does not reduce the overall malaria hazard rate compared to placebo in Mali.

$H_1$ : SR reduces the overall malaria hazard rate compared to placebo (overall malaria hazard ratio between SR and placebo is  $< 1$ ; the expected hazard ratio is 70% or PE is 30%)

## 3 Endpoints

The primary endpoint is the first-time malaria infection (*P. falciparum* (*Pf*)) from the intervention follow-up period. The second endpoints include:

1. Overall new *Pf* malaria infection during the intervention follow-up period.
2. The first-time and overall *Pf* malaria infections by two age groups (6-month to 71 month old; and 6 year to 10- year old).

3. Anopheline-human contact using human biting rate (HBR) as an indicator indoors for all anopheline and by anopheline species.
4. Anopheline survival and population age structure using parity rate as an indicator for all anopheline and by anopheline species.
5. Anopheline infectivity using sporozoite rate as an indicator for all anopheline and by anopheline species.
6. Anopheline infectivity using EIR as an indicator for all anopheline and by anopheline species.
7. Light trap indoor density for each anopheline species and for all anophelines.
8. Baseline and annual insecticide resistance.
9. Adverse events and serious adverse events.

#### **4 Study Design**

The study design is a cluster randomized trial with 30 clusters per intervention arm (SR and Placebo), a 6-month baseline follow-up plus a 2-week baseline evaluation period, and a post-randomization intervention follow-up period of 24 months. For the evaluation of the primary objective, 26 households are recruited with each cluster into the intervention period (factoring in a 35% loss-to-follow-up rate). The same number of households (26) will be recruited into the baseline period. It is expected that 80% of the baseline households will continue to participate the intervention period. At least one kid aged from 6-month to 10-year old from each household is recruited for the biweekly (every 2 weeks) malaria check-up (scheduled and passive) during the intervention follow-up period.

Twenty clusters (10 SR, 10 placebo) will be randomly selected to estimate the impact of the SR on entomological measures of malaria transmission using light trap. Within each cluster, light trap collections will be conducted in 10 randomly selected houses every month to assess the impact of SRs on the density of *Anopheles* mosquitoes indoors. The indoor human landing catches (HLC) will be conducted in 4 randomly selected houses every quarter in 12 randomly selected clusters (6 SR, 6 placebo).

#### **5 Population for analysis**

The intention to treat (ITT) analysis is the primary analysis approach for both the primary and secondary objectives. The ITT population includes the first recruited kid from each recruited household that receives at least one SR product or placebo per the cluster randomization schedule. If a recruited subject comes from a household used for entomological data collection, that subject will be not used in the ITT analysis. The per-protocol (PP) analysis is included as a supplementary analysis for the primary and secondary objectives. The PP population includes the subjects from the ITT population that are treated following the specifications of the study protocol without major protocol deviations.

##### *5.1 Subjects who moves to a new house during the intervention follow-up period*

- For a subject who moves to a different house within the same cluster, that subject will be included in both the ITT and PP analyses. The household characteristics will be updated at the time the subjects moved.
- For a subject who moves to a different house in a different cluster, the data from the subject before the subject moves will be included in the ITT analysis. All data from the subject will be

included in the PP analysis, both the treatment information and the household characteristics will be updated at the time the subjects moved.

5.2 Subjects who are hospitalized for serious complicated illness (e.g. chronic illness), die, drop out, or miss scheduled visits due to reasons not related to the malaria outcome or intervention during the follow-up period

For subjects that fall under this category, the available data from the subjects (up to the time point when the subjects are hospitalized, die, or drop out; data from the scheduled visits that the subjects did not miss) will be included in both the ITT and PP analyses as the missing or absent data can be ignored (see Section 6.4 of the SAP for more details).

5.3 Subjects who do not receive (complete) intervention due to travelling outside, mis-application or partial application of the product

For the ITT analyses, these subjects will be included as is. For the PP analysis, “travel outside” (Y or N; an individual-level covariate) and the product application rate in each household (expected to be close to 100%) will be included as covariates if the data are not overly imbalanced between the Y and N categories for “travel outside”, and there is practically/clinically meaningful variation in the product application rate across households and clusters.

## **6 Definition of new malaria infection**

Following a positive malaria diagnosis, whether the next positive malaria diagnosis, either during the active or passive screening periods, is a new infection or just a remnant or a carryover from the previous malaria infection depends on the time lapse between the two malaria infections, and whether and when the first malaria infection is treated.

The treatment for malaria infection last for 3 days. Denote the first day of treatment by Day 1. A diagnosis test of malaria will take place on Day 15 +/- 3 days (that is, Day 12 to Day 18). If a positive malaria infection is detected during the diagnosis test, then the malaria infection will not be regarded as a new infection but rather a carryover and a second round of 3-day treatment will be conducted. The number of subjects that will be infected but not treated is expected to be minimal (to be confirmed at interim and final analyses of the baseline data). If there is no treatment for an infection, the subsequent positive will be regarded as a new infection only with one negative blood slide between the two positives.

The positive diagnosis that cannot be treated as a new infection will be re-coded as negative before any of the following statistical analysis on malaria infection (baseline, first-time infection, overall malaria infection) is applied. Correspondingly, for the overall incidence rate calculation, (the number of days from Day 1 treating a malaria infection and the post-treatment diagnosis test on Day 15 +/- 3 days).

Also noted is that the active screening of malaria occurs every 4 weeks and the passive screening occurs in between two active screenings only when a subject experiences a fever. It is possible that there are only a few passive screenings upon the completion of data, leading to data imbalance between the odd-numbered visits (the active screening) and the even-numbered visits (the passive screening). To deal with this problem if it occurs, we will apply the following approach. If the passive screening in a visit is negative on malaria, then that data point will be removed as it contains no additional info on malaria or time at risk on top of the active screenings before and after it. If the passive screening is positive, then the passive positive will be assigned to either the active screening visit immediately before the passive screening or after, whichever is closer to the

passive screening in time. The same approach will be applied to the analysis of first-time overall malaria infections in Sec 7.1 and 7.2.

## 7 Statistical Methods

The statistical analysis and results reporting will follow the CONSORT guidelines for CRTs<sup>[1]</sup>.

### 7.1 Primary endpoint (ITT Population)

The baseline characteristics of the enrolled subjects, households, and clusters will be summarized by treatment arm. Specifically, we will examine subject age and gender at the individual level, wall type and roof type, floor height, house open eaves, # of window, # of doors at the household levels, and cluster population and baseline overall infection incidence at the cluster level.

The primary hypothesis on PE against the first-time malaria infection will be tested by comparing the hazard rates of first-time malaria infection between SR and placebo upon the completion of the study in the ITT population. The cloglog regression model  $\log(-\log(1 - \theta_{kjit})) = \beta_{0t} + x_{kji}^T \beta_1 + z_k + z_{j(k)}$  will be applied<sup>[2-7]</sup>, where the term  $z_{j(k)}$  will be only necessary if some households contribute more than one individuals to the study.  $\theta_{kjit}$  is the discrete time hazard rate of subject  $i$  from household  $j$  in cluster  $k$  at time  $t$ , and  $x_{kji}$  contains the individual-level (age, gender), household-level (number of doors, number of windows, open eaves Y or N, wall type, roof type), and cluster-level (baseline incidence rate, cluster population size, intervention group) covariates. If the data are extremely unbalanced in a categorical covariate (not in terms of the distributions between the treatment arms, but the marginal distribution of the variable itself; e.g., 99% households have the same type of walls vs 1% do not) or if a non-ignorable portion of the subjects have missing values on a covariate (due to MAR or MCAR), that covariate may be excluded in the model.  $z_k \sim N(0, \sigma_1^2)$  and  $z_{j(k)} \sim N(0, \sigma_2^2)$  are the random effects at the cluster and household levels respectively. The cloglog model is a proportional hazard model and thus HR does not depend on time  $t$ . The null hypothesis of PE = 0% is equivalent to  $\beta = 0$ , which will be tested by the Wald's test  $z = \hat{\beta}/s$ , where  $s$  is the estimated standard error of  $\hat{\beta}$ . PE is estimated by  $(1 - \exp(\hat{\beta})) \times 100\%$ , where  $\hat{\beta}$  is the estimated regression coefficient associated with the treatment group, and  $\exp(\hat{\beta})$  is the estimated hazard ratio (HR) between SR and placebo, with a 90% 2-sided CI based on the Wald test. The lower bound of the 90% CI corresponds to the lower-bound of the 95% 1-sided CI (the hypothesis is one-sided).

### 7.2 Secondary endpoints (ITT Population)

#### PE of SR against the overall (both first-time and recurrent) malaria infection

The secondary hypothesis on PE against the overall new malaria infections, as defined in Sec 6, will be tested by comparing the hazard rates of the overall malaria infection between SR and placebo in the ITT population. The complementary log-log (cloglog) regression model  $\log(-\log(1 - \theta_{kjit})) = \beta_{0t} + x_{kji}^T \beta_1 + z_k + z_{j(k)} + z_{i(jk)}$  will be applied<sup>[2-7]</sup>. The term  $z_{i(jk)}$  will be only necessary if some households contribute more than one individual to the study.  $\theta_{kjit}$  is the discrete time hazard rate of subject  $i$  from household  $j$  in cluster  $k$  at time  $t$ , and  $x_{kji}$  contains the individual-level (age, gender), household-level (number of doors, number of windows, open eaves Y or N, wall type, roof type), and cluster-level (baseline incidence rate, cluster population size, intervention group) covariates. If the data are extremely unbalanced in a categorical covariate (not in terms of the distributions between the treatment arms, but the marginal distribution of the

variable itself; e.g., 99% households had the same type of walls vs 1% that did not) or if a non-ignorable portion of the subjects have missing values on a covariate (due to MAR or MCAR), that covariate may be excluded in the model.  $z_k \sim N(0, \sigma_1^2)$ ,  $z_{j(k)} \sim N(0, \sigma_2^2)$ , and  $z_{i(jk)} \sim N(0, \sigma_3^2)$  are the random effects at the cluster, household, and individual levels respectively. The cloglog model is a proportional hazard model and thus HR does not depend on time  $t$ . The null hypothesis of PE = 0% is equivalent to  $\beta = 0$ , which will be tested by the Wald's test  $z = \hat{\beta}/s$ , where  $s$  is the estimated standard error of  $\hat{\beta}$ . A one-sided p-value and 90% 2-sided confidence interval (CI) for PE will be provided, the lower bound of which corresponds to the lower-bound of the 95% 1-sided CI (the hypothesis is one-sided). If the one-sided p-value between SR and placebo  $< 0.05$ , we reject the null hypothesis, claiming SR reduces the overall malaria hazard rate compared to placebo in Mali at the significance level of 5%; otherwise, we fail to reject the null hypothesis, claiming SR does not reduce the overall malaria hazard rate compared to placebo in Mali.

#### Subgroup PE analysis by age group

The above analysis of the first-time and overall malaria infections in the examination of the PE of SR will be based on all the subjects aged 6 months to 10 years. The same set of analysis will also be performed by two age subgroups: 6-month to 71-month old, and 6-year to 10-year old to examine if the PE of SR differs by two age groups.

#### PE analysis without baseline covariates

A PE analysis on the first-time and the overall infections will be also performed by removing all the baseline covariates from the cloglog models presented Sec 7.1 and 7.2 and only keeping "intervention group" as the only covariate (in addition to visit, as a categorical predictor per the model assumptions and set-up). The hazard ratios between SR and placebo will be provided, along with 2-sided 90% CIs.

#### Incidence rate

The first-time and overall malaria incidence rates per person-year during the whole intervention follow-up will be calculated by cluster for the SR and the placebo arms respectively. The first-time malaria incidence rate is defined as the ratio of the number of first-time malaria cases during the whole study vs sum of the time to event/time at risk (in year) across the individuals within the same cluster, and the overall malaria incidence rate is defined as the ratio of the number of new malaria cases during the whole study vs sum of the time to event/time at risk (in year) for each of the new cases across the individuals within the same cluster.

Since the active screenings of malaria incidences are either every 4 weeks (active screening) with passive screening taken between two active screenings if fever is reported, the actual time for contracting malaria is unknown (interval censored). Therefore, the mid-point between two consecutive screenings will be used as the time at risk for a malaria event that occurs in the latter screening. The average per-person-year first-time and overall malaria incidence rates in the SR and placebo arms, and the incidence ratios between the two will be calculated, together with the coefficients of variation in both arms on both incidence endpoints.

#### Effects SR on entomological endpoints

The endpoints in the entomological analysis include the HBR (number of anopheline- caught during the 12-hr interval overnight), anopheline parity rate, anopheline sporozoite rate, and anopheline EIR, and the anopheline indoor density collected by light-trap.



We will report the frequencies and proportions of each mosquito Genus and species (anopheline and non-anophelines) collected using HLC and light trap methods across clusters and treatment arm. In addition, the following analysis will be performed for each major vector and for all anophelines.

The time profile plots of each aggregated entomological endpoints will be obtained over the baseline and intervention period. An appropriate statistical model for the HBR will be identified after examining the distributional characteristics of the HBR data, which are likely to follow (zero-inflated) Poisson distribution, or (zero-inflated) negative binomial distribution if there is over-dispersion. The covariates in the models will include the fixed effects of intervention, time, cluster population size, number of houses in a cluster, location (inside or outside), location and intervention interaction; and a random effect for cluster. The ratio between SR and placebo in HBR will be estimated, and the %change in HBR by SR is given by  $(1 - \text{HBR ratio}) \cdot 100\%$ .

The model for parity rate will be the (zero-inflated) Poisson distribution or a (zero-inflated) negative binomial distribution with the daily porous mosquitos as the outcome and the daily HBR as the offset, and the same set of covariates as those used in the model for analyzing HBR. The model for the sporozoite rate will be similar to the parity rate with the change of outcome variable to daily mosquitos with positive sporozoite. Note that if the data on parity and sporozoite positivity are highly unbalanced (not in terms of the distributions between the treatment arms, but the marginal distribution of the variable itself; e.g., 99% nulliparous or 99% negative sporozoite), then the model might lead to unstable estimates or the model might not even converge. In such cases, only summary statistics will be provided.

The time profile plots of each of light trap indoor density will be obtained over the baseline and intervention period. An appropriate statistical model will be identified after examining the distributional characteristics of the light trap indoor density which are likely to follow (zero-inflated) Poisson distribution, or (zero-inflated) negative binomial distribution if there is over-dispersion. The covariates in the models will include the fixed effects of intervention, time, cluster population size, and a random effect for cluster. The ratio between SR and placebo on light trap indoor density will be estimated.

EIR is defined as the number of infective mosquito bites a person receives per unit time (typically annually) and is calculated as  $\text{HBR} \times \text{sporozoite rate} = \frac{\# \text{ of mosquitoes collected}}{\# \text{ of capture nights}} \times \frac{\# \text{ of sporozoite positive mosquitos}}{\# \text{ of mosquitos tested}}$ . We will calculate the EIR calculation per household per cluster per unit time and provide summary statistics at baseline and per year during the intervention period by treatment group.

Summary statistics will also be provided for. insecticide resistance during the intervention period by treatment.

#### Analysis of the relationship between malaria hazard rate vs the entomological endpoints

To explore the relationship between the malaria hazard rate and the entomological endpoints, a similar model as the cloglog models used to address the primary objective on the first-time malaria infection and the secondary endpoint on the overall malaria infection will be applied to the epidemiological and entomological data in the clusters from which the entomological data are collected. The random effects and the individual-level and, household-level covariates will be the same as the cloglog models, and the cluster-level covariates will include the baseline incidence

rate, cluster population size, and a covariate that captures the entomological information. Specifically, for HBR, the measurement to be paired with a malaria diagnosis in an individual is average daily HBR taken within 7 to 28 days before the diagnosis over the two-week period and over the sentinel households where entomological endpoints are collected in the same cluster to which the individual belongs. The regression coefficient associated with  $\log(\text{HBR})$  quantifies the change in the malaria hazard rate on the log scale, given one unit increase in  $\log(\text{HBR})$ . For parity rate and sporozoite positivity rate, as long as there is enough data collected on these two endpoints and they are not highly unbalanced with regard to its marginal distribution (e.g., 99% mosquitos caught are nulliparous or sporozoite negative), the relationship between the malaria hazard rate and those two will also be investigated in a similar fashion as for HBR.

#### Safety assessment

Summary of symptom-based adverse events (AE), severe adverse events (SAE), and death reports observed during the studies will be reviewed by the trial DSMB at predetermined checks (quarterly). The AE/SAE will be labelled “Probable”, “Possible”, “Plausible”, “Unlikely” due to SR. Summary about AE/SAE, including mean, minimum and maximum frequencies and percentages across clusters among enrolled subjects, will be provided by the treatment arm. Statistical comparisons of the AE/SAE rates between the two arms will be conducted upon the completion of the study. Two sets of statistical analysis will be run. One set will compare the proportion of having at least one occurrence in each symptom-based AE/SAE during the whole study between the two arms, and the other will compare the total number of occurrences for each AE/SAE between the two study arms. If the data collected permits meaningful statistical hypothesis testing, p-values from the treatment comparisons will be reported, with multiplicity correction via the FDR approach [8].

### **7.3 Supplementary analysis**

#### Temporality of PE effects

It is expected malaria incidence changes by seasonality (rainy vs dry) and year. To examine the temporality of malaria incidence rates and the PE effect, a supplementary analysis will performed by adding the seasonality (Jun-Dec/wet/peak) and Jan-May/dry/low) and year (1 and 2) and their interaction with intervention to the covariate list in the cloglog models used for analyzing the first-time and overall infections. The PE will be estimated by seasonality and year.

#### Human behavior adjusted PE analysis

The primary and secondary analyses laid out in Sections 7.1 and 7.2 for the first-time infection, the overall infection, and the examination of relationship between the ento- and epi- endpoints will also be carried out by adjusting for the human behavior covariates the cloglog models, including “bednet usage” in the last 24 hrs (Y or N), “travel outside” (Y or N; an individual-level covariate), and the product application rate in each household (expected to be close to 100%) if the data are balanced between the Y and N categories on “bednet usage” and “travel outside”, and there is practically/clinically meaningful variation in the product application rate across households and clusters.

#### Adjusted HBR analysis

The adjusted HBR at a given time point is calculated as the raw HBR $\times$  the proportion of people at the risk of being bitten in each household. Specifically, in each household where the HBR data are collected in the hourly interval from 6pm to 6am, the number of people indoor, the number of people outdoor, the number of people under bednet indoor, the number of people sleeping outdoor

are also collected. The adjusted HBR indoor = raw HBR × number of subjects not under the protection of bednet/ total number of indoor subject, and the adjusted HBR = raw HBR × number of subjects who sleep / total number of subject outdoor. The analysis specified for the estimating the effects SR on the raw HBR in Sec 7.2 will be applied to the adjusted HBR.

#### Per-protocol analysis

If the PP sample set differs from the ITT sample set, per the criteria listed in Sec 5, the primary analysis on the first-time infection and the secondary analysis on the overall infections as listed in Sec 7.1 and 7.2 will also be performed in the PP sample set.

### **7.4 Handling of missing data**

Significant effort will be made to avoid having missing values on outcome (malaria infection status and visit dates, and entomological endpoints). When missing values occur for an outcome for reasons not related to the outcome, reasons for missingness and the missing fraction by treatment arm and cluster will be reported. Per protocol, the subjects are screened actively on their malaria status (the outcome) every four weeks.

- If a subject misses one or more scheduled visits due to reasons not related to the SR product or the outcome, the subject will have missing values on the outcome that can be regarded as ignorable missingness (MAR or MCAR) <sup>[9]</sup>.
- If a subject drops out study due to reasons unrelated to the SR product and/or malaria infection, then the missing observations from the subject can be regarded as ignorable missingness (MAR or MCAR).

In both cases, all the available data from the subject will be included in the primary and secondary analysis, without employing any specific missing data analysis techniques, due to the ignorability of the missing mechanisms.

Missing baseline covariates (individual-level, household-level, and cluster-level) that are a part of the regression models for the outcome of interest will be imputed using simple hot-deck imputation methods if the missing fraction for the covariate is <5%>. If the missing fraction for a covariable are ≥5%, appropriate multiple imputation approaches will be applied. If a non-ignorable portion of the subjects have missing values on a covariate (due to missing at random or missing completely at random), that covariate may be excluded in the model.

### **7.5 Analysis of baseline**

The per-person-year first-time and overall malaria incidence rate from the 60 recruited clusters will be calculated. Since the malaria incidences are collected on a biweekly basis, the mid-point between two visits will be imputed as the time at risk for a malaria event. The average incidence rate will be calculated, together with the coefficients of variation. The baseline analysis will occur the end of Month 3 and Month 6, respectively, during the baseline period internally.

### **7.6 Interim analysis**

No interim analysis will be performed on the malaria and entomological data collected from the intervention period post randomization. The baseline data will be analyzed at the mid-point of the baseline period.

## **8. Software**

Software used will be SAS for Windows, Version 9.4 or higher (SAS Institute, Cary, NC, USA) and RStudio Version 1.0.143 or higher (RStudio, Inc, Boston, MA, USA).

## 9. Sample Size Determination

The sample sizes below might be adjusted based on the data collected during the 4-month baseline period. Since the adjustment will only utilize the baseline data (baseline incidence and CV) with intervention information, the Type-I error rate will not be inflated.

### Primary hypothesis on first-time malaria infection

The sample size determination on the required number of households per cluster for testing the primary hypothesis on PE is based on the hazard rate comparison in the proportional hazards regression model<sup>[10-11]</sup>. With the following specifications: 1-sided type-I error rate = 5% (because the primary hypothesis is one-sided as SR is very unlikely to increase the hazard rate of malaria infection compared to placebo), true PE = 30%, a between-cluster coefficient of variance (CV) of hazard rate = 47% (based on the historical data collected from Mali) then **788 independent first-time malaria events** will need to be observed to reach 80% power in testing the primary hypothesis on PE.

With a baseline first-time malaria infection hazard rate of 1.0 per person-year (ppy), 30 clusters per treatment, **26 households per cluster** (factoring in a loss to follow-up rate at 35%) **in each treatment arm post randomization** are expected to yield 788 independent first-time malaria events within 24 months follow-up period per cohort post randomization to yield 80% power. If, by the end of the 2-year study, 788 independent malaria events are not reached, the study may extend until 788 events are collected without inflating the type I error rate in the testing of the primary hypothesis. Appendix I provides the sample size under different assumptions of baseline incidence rate (1.5, 1, 0.7, 0.5 and 0.25 ppy).

The same number of households (26) will be recruited into the baseline period. It is expected that 80% of the baseline households will continue to participate the intervention period.

### Secondary hypothesis on overall malaria infection

The sample size calculated to yield 85% power for establishing the primary hypothesis on first-time infection PE also leads to at least 85% power when it comes to the testing of the secondary hypothesis on the overall malaria infection. This is because that the baseline overall malaria incidence rate is likely to be no lower than 0.7 per person-year (the first-time incidence rate), and there is no interim analysis on the second hypothesis.

**Note:** Since the sample sizes for PE evaluations already factors in the LTFU rate, there is no need for replacement subjects unless the LTFU is larger than assumed. If replacement subjects are to be recruited, they should not have been exposed to the intervention until the time they are considered for replacement.

## Reference

1. Marion K Campbell, Gilda Piaggio, Diana R Elbourne, Douglas G Altman (2012), Consort 2010 statement: extension to cluster randomised trials, *BMJ* 345:e5661
2. J. D. Kalbfleisch, R. L. Prentice (2002, 2<sup>nd</sup> ed), *The Statistical Analysis of Failure Time Data*, Wiley-Interscience
3. P. D. Allison (1982), *Discrete-Time Methods for the Analysis of Event Histories*, *Sociological Methodology*, 13: 61-98
4. D. Collett (2002, 2<sup>nd</sup> ed), *Modelling Binary Data*, Second Edition, Chapman & Hall

5. B. P. Carlin and J. S. Hodges (1999), Hierarchical proportional hazards regression models for highly stratified data, *Biometrics*.55(4):1162-1170
6. V. Henschell, J. Engel, D. Hölzel and U. Mansmannina (2009), A semiparametric Bayesian proportional hazards model for interval censored data with frailty effects, *BMC Medical Research Methodology*, 9:9
7. G. Yin and J. G. Ibrahim (2005), A Class of Bayesian Shared Gamma Frailty Models with Multivariate Failure Time Data, *Biometrics*, 61(1):208-216
8. Benjamini Y, Hochberg Y (1995). *Controlling the false discovery rate: a practical and powerful approach to multiple testing*, *Journal of the Royal Statistical Society, Series B*. 57 (1): 289–300
9. R. J. A. Little and D. B. Rubin (2002), *Statistical Analysis with Missing Data* (2<sup>nd</sup> edition), J. Wiley & Sons, New York.
10. M. Lievens, J. J. Aponte, J. Williamson, B. Mmbando, A. Mohamed, P. Bejon and A. Leach (2011), Statistical methodology for the evaluation of vaccine efficacy in a phase III multi-centre trial of the RTS,S/AS01 malaria vaccine in African children, *Malaria Journal*, 10:222
11. The RTS,S Clinical Trials Partnership (2011), First Results of Phase 3 Trial of RTS,S/AS01 Malaria Vaccine in African Children, *The New England Journal of Medicine*, 365(20): 1863-1875.

## Appendix

### I. Sample size under different assumptions of baseline incidence rate

The table below shows, with a 47% between-cluster coefficient of variation (CV) of hazard rate 30 cluster per treatment arm, the required number of households to yield a total number of first-time independent events of 788 within a two-year intervention period for different baseline incidence rate. The calculation factors in a 35% LTFU rate for establishing the primary hypothesis on PE with 80% power under the 1-sided type-I error rate = 5% with true PE = 30%.

| baseline | # HHs per cluster | Total # of HHs (Intervention period) | # of HHs per cluster (Intervention + baseline) * | Total # of HHs (Intervention + baseline) * |
|----------|-------------------|--------------------------------------|--------------------------------------------------|--------------------------------------------|
| 1.5      | 20                | 1200                                 | 24                                               | 1440                                       |
| 1        | 23                | 1380                                 | 28                                               | 1680                                       |
| 0.7      | 26                | 1560                                 | 32                                               | 1920                                       |
| 0.5      | 32                | 1920                                 | 39                                               | 2340                                       |
| 0.25     | 52                | 3120                                 | 63                                               | 3780                                       |

\* Assuming 80% HHs in baseline will continue to participate in the intervention period

## II. Mock Tables and Figures

Figure A1: flow diagram of progress of clusters and individuals (From Campbell (2010):  
*Consort 2010 statement: extension to cluster randomized trials*)

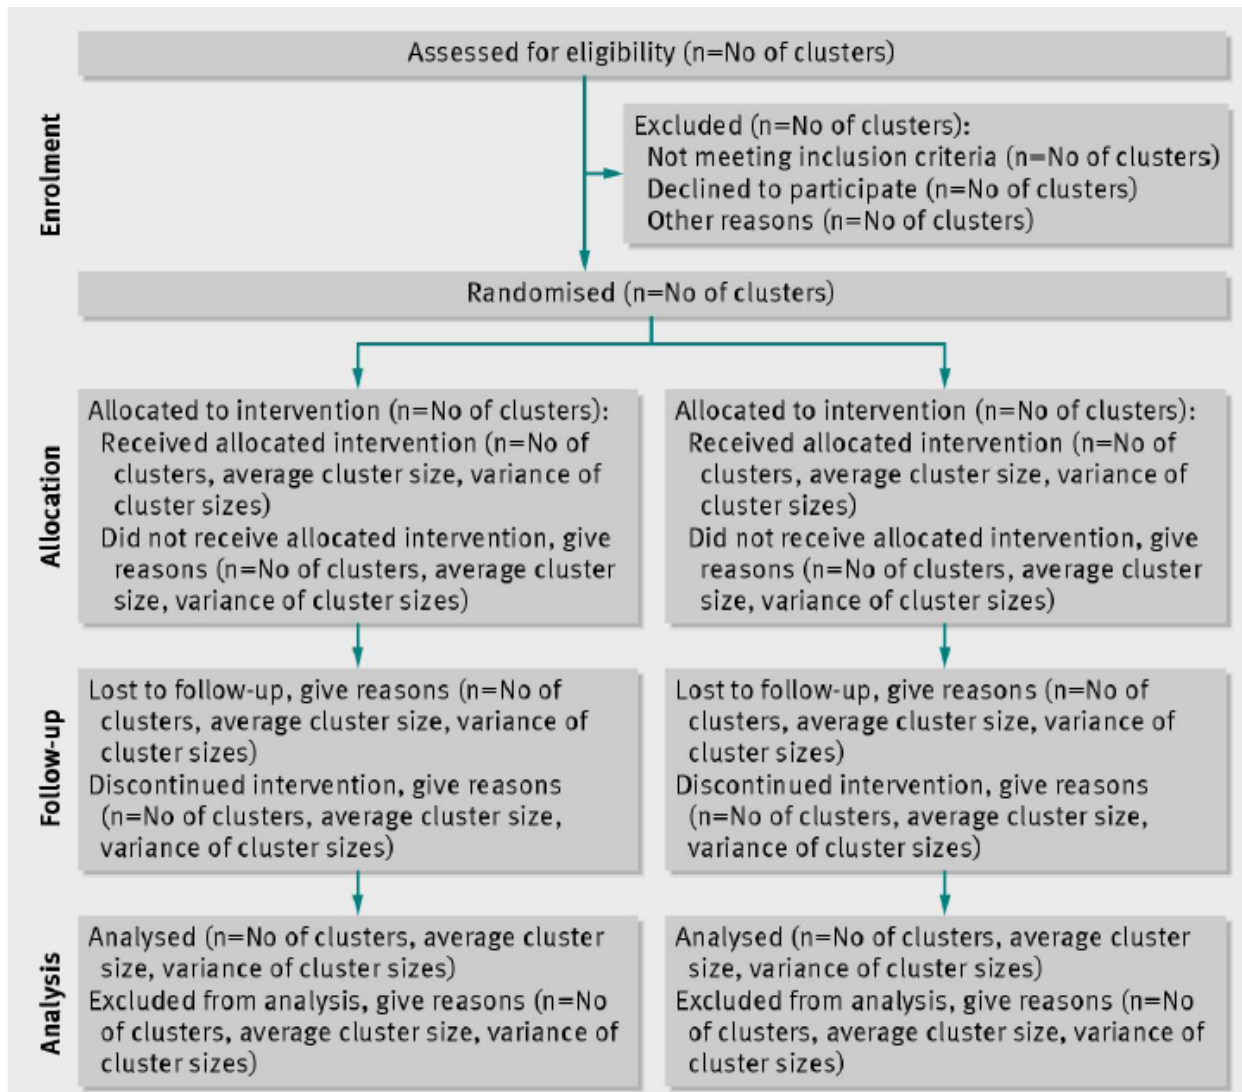

Table A1: Summary on baseline covariates

| <b>Individual level</b>                                                                                                                                                               |           |                |
|---------------------------------------------------------------------------------------------------------------------------------------------------------------------------------------|-----------|----------------|
|                                                                                                                                                                                       | <b>SR</b> | <b>Placebo</b> |
| Age in months (mean $\pm$ SD, (min, max))<br>Gender (% of boys)                                                                                                                       |           |                |
| <b>Household level</b>                                                                                                                                                                |           |                |
|                                                                                                                                                                                       | <b>SR</b> | <b>Placebo</b> |
| house wall type (% , n)<br>house roof type (% , n)<br>Floor height (mean $\pm$ SD, n)<br>house open eaves (% , n)<br># of windows (mean $\pm$ SD, n)<br># of doors (mean $\pm$ SD, n) |           |                |
| <b>Cluster level</b>                                                                                                                                                                  |           |                |
|                                                                                                                                                                                       | <b>SR</b> | <b>Placebo</b> |
| Cluster population (mean $\pm$ SD, (min, max))<br>Baseline overall infection incidence per person-year (mean $\pm$ SD, (min, max))                                                    |           |                |

Table A2: Protective Efficacy (PE) of SR against all infections

| Look | Treatment | Baseline incidence rate | # of households | # of infections | hazard ratio (95% CI) | PE (95% CI) | p-value |
|------|-----------|-------------------------|-----------------|-----------------|-----------------------|-------------|---------|
| p1   | SR        |                         |                 |                 |                       |             |         |
|      | placebo   |                         |                 |                 |                       |             |         |
| 2    | SR        |                         |                 |                 |                       |             |         |
|      | placebo   |                         |                 |                 |                       |             |         |

Baseline coefficient of variation (CV) of incidence rate: xxx%

Similar tables will be provided on the 1) 1<sup>st</sup>-time malaria infections, 2) by-age group analysis on PE; and 3) the supplementary PE analysis for 1<sup>st</sup>-time, overall, and by-age group infections with no covariates included in the cloglog model.



Table A3: Effects of SR compared to placebo on the entomological endpoints

| Endpoint                    | Mean (95% CI) |         | Ratio (95% CI) |
|-----------------------------|---------------|---------|----------------|
|                             | SR            | Placebo | SR vs. placebo |
| HBR                         |               |         |                |
| Parity rate                 |               |         |                |
| sporozoite positivity rate  |               |         |                |
| Indoor density (light trap) |               |         |                |

Figure A2: Kaplan Meier Curves for SR and placebo on 1<sup>st</sup>-time malaria infections

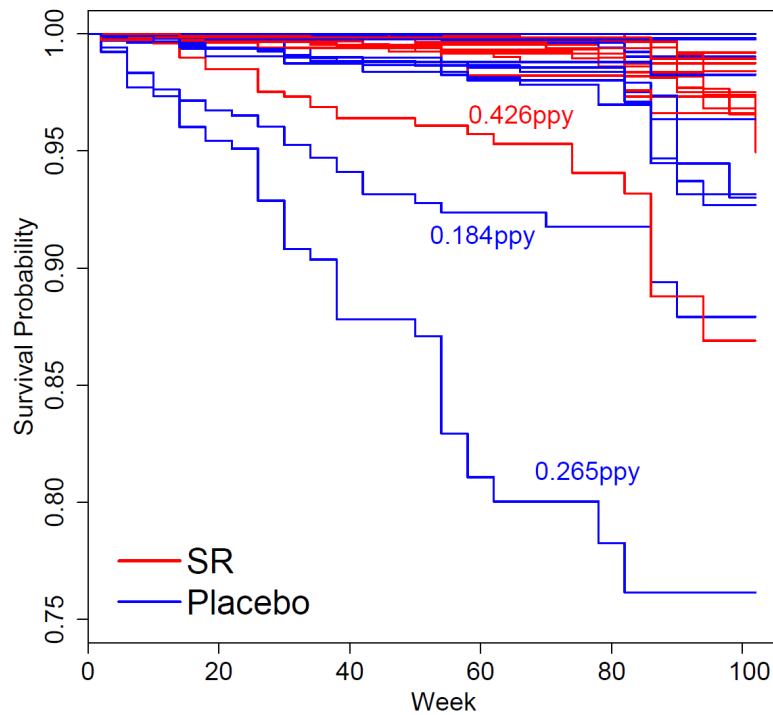

The KM curves will be generated for all recruited subjects, and also by age group (< 6 years old vs  $\geq$  6 years old).

Figure A3: time profile of estimated HBR (adjusted for baseline. The time unit is every 2 weeks)

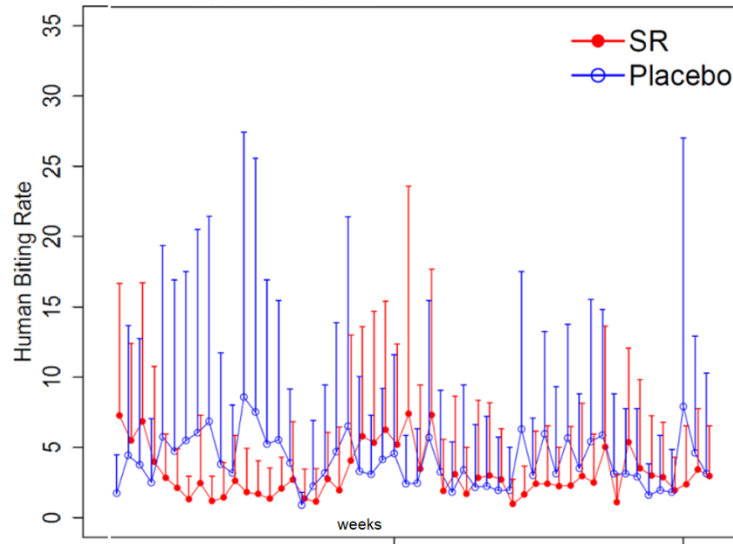

Table A4: AE and SAE Summary Statistics

|                                                                          | Mean (Min, Max) Frequency (Percentage) across Cluster |    |         |
|--------------------------------------------------------------------------|-------------------------------------------------------|----|---------|
|                                                                          | SR related*                                           | SR | Placebo |
| Adverse Event/Symptoms **                                                |                                                       |    |         |
| Skin irritation/Rash                                                     | Possible                                              |    |         |
| Runny nose                                                               | Possible                                              |    |         |
| Nausea/Vomiting                                                          | Possible                                              |    |         |
| Salivation/Drooling                                                      | Plausible                                             |    |         |
| Cough                                                                    | Unlikely                                              |    |         |
| Eye irritation                                                           | Unlikely                                              |    |         |
| Headache                                                                 | Unlikely                                              |    |         |
| Diarrhea                                                                 | Unlikely                                              |    |         |
| Abdominal discomfort                                                     | Unlikely                                              |    |         |
| Difficulty Breathing                                                     | Unlikely                                              |    |         |
| Other                                                                    | Unlikely                                              |    |         |
| Serious Adverse Event **                                                 |                                                       |    |         |
| Congenital anomaly/<br>Birth defect                                      | Unlikely                                              |    |         |
| Death                                                                    | Unlikely                                              |    |         |
| Persistent or Significant<br>Disability or Incapacity                    | Unlikely                                              |    |         |
| Hospitalization or prolongation<br>of existing hospitalization           | Unlikely                                              |    |         |
| Other                                                                    | Unlikely                                              |    |         |
| * Defined per SJC safety tests.                                          |                                                       |    |         |
| ** AE and SAE summaries of the clinical diagnosis (disease) may be added |                                                       |    |         |

Table A5: Statistical Comparison on having at least AE and SAE

| AE                     | Frequency (percentage) |                  | SR vs. placebo (p-Value) |           |
|------------------------|------------------------|------------------|--------------------------|-----------|
|                        | SR (N= xxx)            | Placebo (N= xxx) | raw                      | adjusted* |
| Skin irritation/Rash   |                        |                  |                          |           |
| Runny nose             |                        |                  |                          |           |
| Nausea/Vomiting        |                        |                  |                          |           |
| .....                  |                        |                  |                          |           |
| * FDR-adjusted p-value |                        |                  |                          |           |

Table A6: Statistical Comparison on the total number of AE and SAE

| AE                     | Frequency   |                  | SR vs. placebo (p-Value) |           |
|------------------------|-------------|------------------|--------------------------|-----------|
|                        | SR (N= xxx) | Placebo (N= xxx) | raw                      | adjusted* |
| Skin irritation/Rash   |             |                  |                          |           |
| Runny nose             |             |                  |                          |           |
| Nausea/Vomiting        |             |                  |                          |           |
| .....                  |             |                  |                          |           |
| * FDR-adjusted p-value |             |                  |                          |           |

### III. Some sample SAS and R procedures used in the analysis

Note the final codes for KM curves and estimation if PE could differ slightly from the sample codes below, which are meant to demonstrate the main procedures/commands in R and SAS to run the those two types of analyses rather than to be followed strictly.

**a) KM curves for each cluster. Some sample codes are given below.**

```
library(interval)
fit<-icfit(Surv(left,right,type="interval2")~treatment, data=malaria)
plot(fit)
```

**b) For estimating the PE of SR against first-time and overall malaria infection**

SAS procedure PROC glimmix with the cloglog link. Each subject will have multiple rows, one for each visit. The statement random will be included to take account of the dependency of the subjects from the same cluster. Some sample codes are given below.

```
proc glimmix data=WORK.IMPORT NOCLPRINT method=LAPLACE;
class Subject_ID Cluster Final_Diagnosis Treatment_Allocation Gender
Eaves_Open wallwood recoded_visit;
model Final_Diagnosis (event='POS')=
  Treatment_Allocation
  Gender
  Eaves_Open
  wallwood
  age_scaled
  Number_of_Doors
  clusterpop_scaled
  BaselineIncidence
  recoded_visit/ dist=binary solution link=cloglog;
random int / subject=Cluster;
estimate 'Treatment' Treatment_Allocation 1 -1 /alpha=0.1 cl exp;
ods output estimates=treatest; run;
```
